# Supplementary material
Source: MDPI journal article supplement (https://www.mdpi.com/2073-4395/12/4/950)
Supplement: s1 [file s1]

**Table S1.** Calculation of the doses of mineral fertilizers for the targeted harvest of winter wheat grain for rainfed areas of southern Kazakhstan

| Variables                                                       | For the targeted<br>2 tons of grain per ha,<br>kg/ha |                               |
|-----------------------------------------------------------------|------------------------------------------------------|-------------------------------|
|                                                                 | N                                                    | P <sub>2</sub> O <sub>5</sub> |
| Removal of nutrients with the harvest, 100 kg, kg               | 3.7                                                  | 1.8                           |
| Required for the targeted harvest, kg/ha                        | 74.0                                                 | 36.0                          |
| Removal by crop from soil (without fertilizers) 0.7 t/ha, kg/ha | 25.9                                                 | 12.6                          |
| Required to be applied with mineral fertilizers, kg/ha          | 48.1                                                 | 23.4                          |
| Coefficient of nutrient use from fertilizers, %                 | 70.0                                                 | 30.0                          |
| To be applied taking into account the use efficiency, kg/ha     | 59.6                                                 | 20.4                          |
| Soil nutrient supply                                            | low                                                  | low                           |
| To be applied taking into account the supply, kg/ha             | 60.0                                                 | 20.0                          |
